# Supplementary material for: Smartphone-based digital image colorimetry for determination of iron in cereals and crispy seaweed using Terminalia chebula retz. extract as a natural reagent
Source: Royal Society of Chemistry journal article supplement (doi:10.1039/d2ay01345b), 2022-01-01
Supplement: d2ay01345b1.pdf [file d2ay01345b1.pdf]

### Supporting Figures: UV-Vis spectra

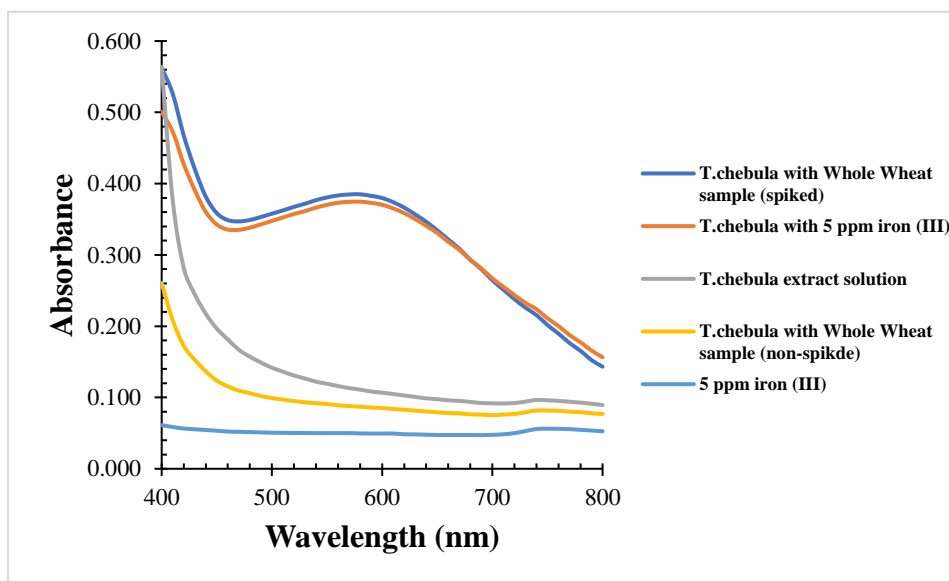

**Fig. 1** UV-Vis spectra of *Terminalia chebula* Retz. complexes with whole wheat sample (spiked and non-spiked), *Terminalia chebula* Retz. complexes with 5 ppm iron (III), 5 ppm iron (III) and *Terminalia chebula* Retz. extract solution.

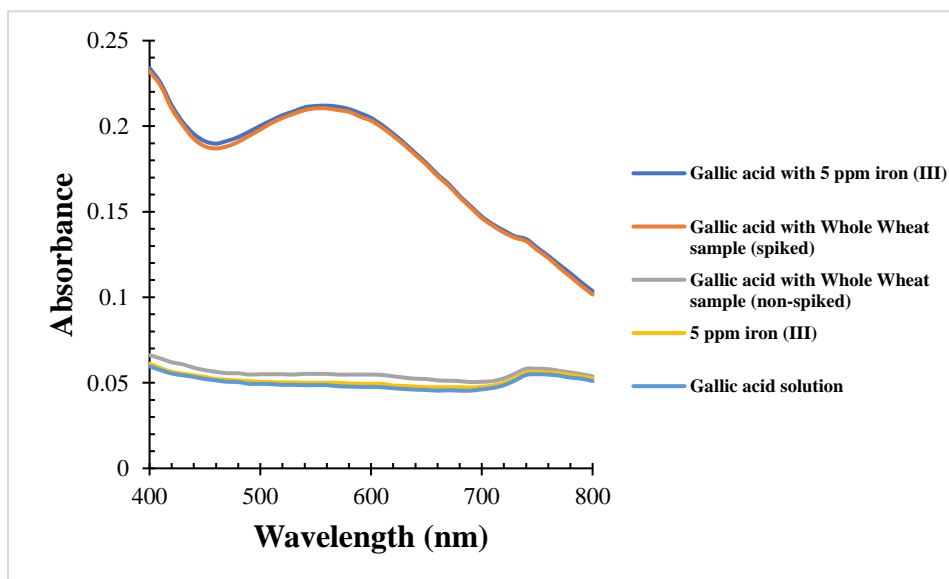

**Fig. 2** UV-Vis spectra of gallic acid complexes with whole wheat sample (spiked and non-spiked), gallic acid complexes with 5 ppm iron (III), 5 ppm iron (III) and gallic acid extract solution.

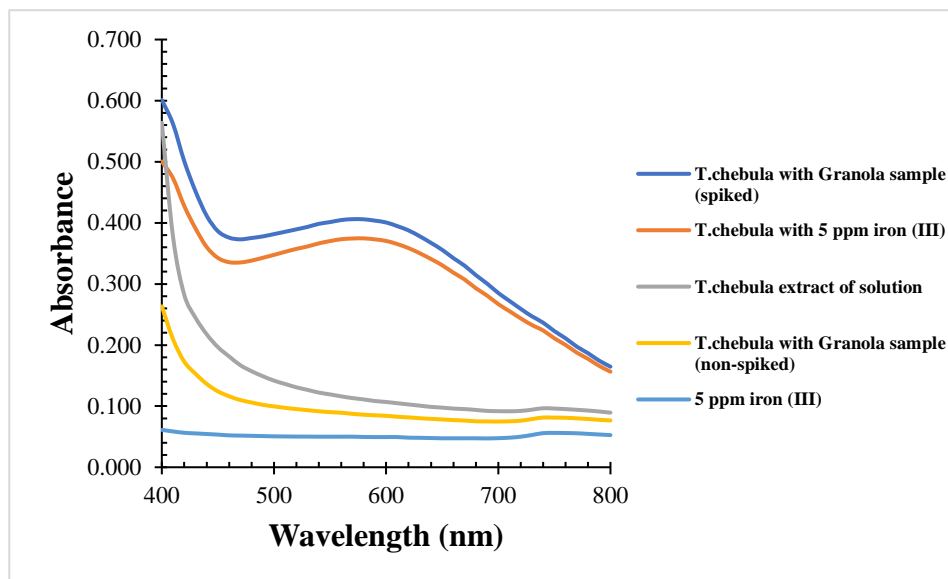

**Fig. 3** UV-Vis spectra of *Terminalia chebula* Retz. complexes with granola sample (spiked and non-spiked), *Terminalia chebula* Retz. complexes with 5 ppm iron (III), 5 ppm iron (III) and *Terminalia chebula* Retz. extract solution.

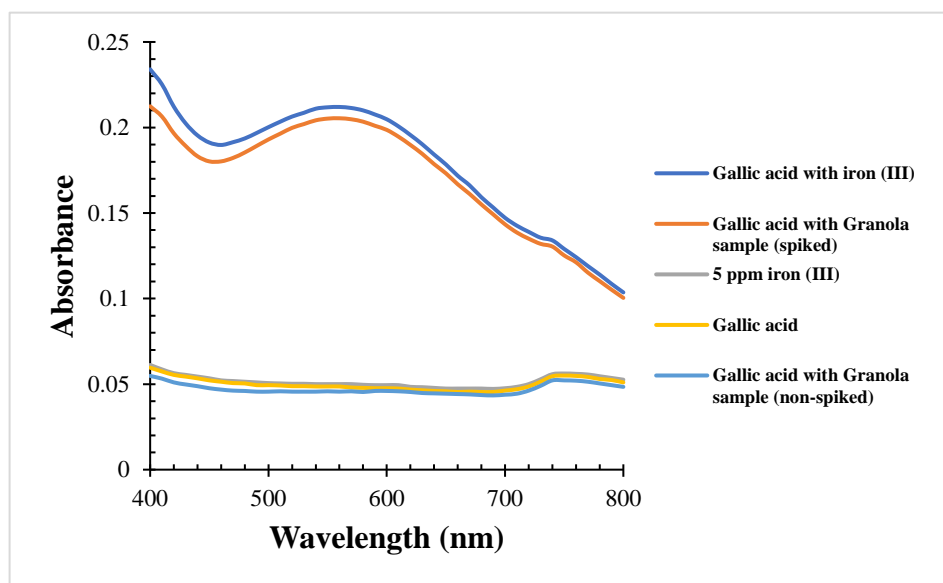

**Fig. 4** UV-Vis spectra of gallic acid complexes with granola sample (spiked and non-spiked), gallic acid complexes with 5 ppm iron (III), 5 ppm iron (III) and gallic acid extract solution.

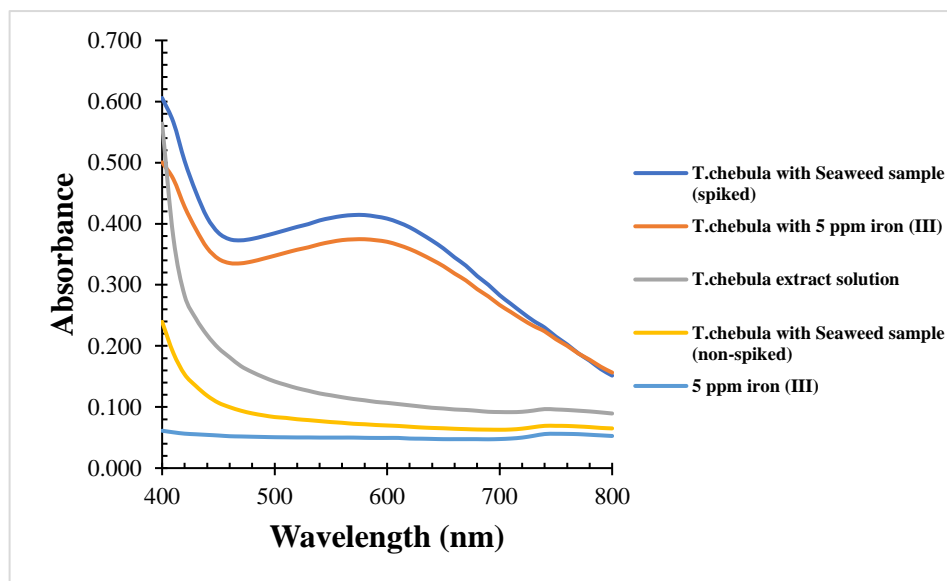

**Fig. 5** UV-Vis spectra of *Terminalia chebula* Retz. complexes with seaweed sample (spiked and non-spiked), *Terminalia chebula* Retz. complexes with 5 ppm iron (III), 5 ppm iron (III) and *Terminalia chebula* Retz. extract solution.

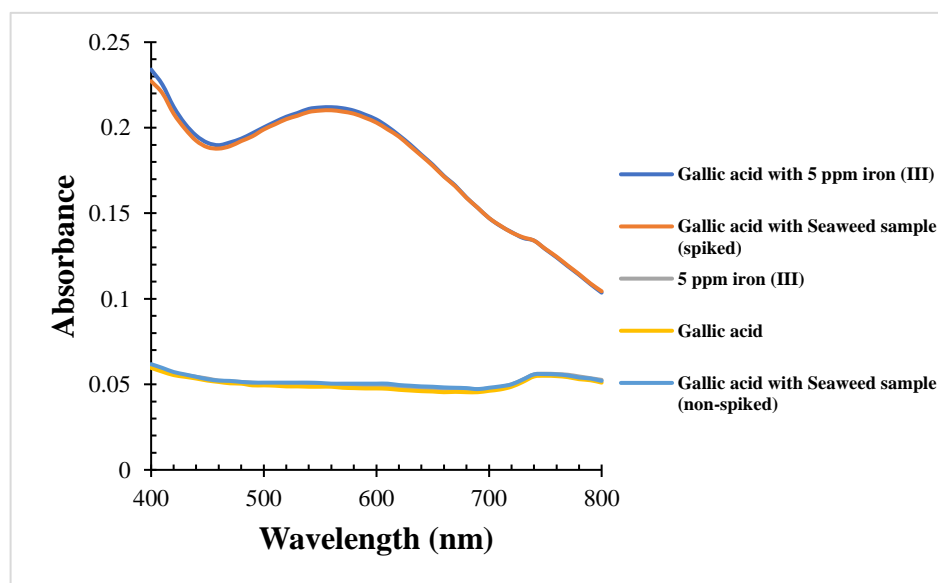

**Fig. 6** UV-Vis spectra of gallic acid complexes with seaweed sample (spiked and non-spiked), gallic acid complexes with 5 ppm iron (III), 5 ppm iron (III) and gallic acid extract solution.
